# Supplementary material for: Molecular engineering with CuanCl for effective optimization of a defective interface for wide-bandgap perovskite solar cells
Source: Royal Society of Chemistry journal article supplement (doi:10.1039/d3ta07690c), 2024-01-01
Supplement: d3ta07690c1.pdf [file d3ta07690c1.pdf]

## Supporting Information

### Molecular Engineering with CuanCl for Effectual Optimization of Defective Interface for Wide-Bandgap Perovskite Solar Cells

Maoxia Xu<sup>a</sup>, Rui Liu<sup>a</sup>, Haoran Ye<sup>a</sup>, Haorong Ren<sup>a</sup>, Jinyu Li<sup>a</sup>, Chen Deng<sup>a</sup>, Zetan  
Zhang<sup>a</sup>, Chengbin Yang<sup>a</sup>, Kexin Hu<sup>a</sup>, Xiaoran Sun<sup>\*a</sup>, and Hua Yu<sup>\*b</sup>

<sup>a</sup> School of New Energy and Materials, Southwest Petroleum University, Chengdu,  
610500, China

<sup>b</sup> School of Physical Sciences, Great Bay University, Dongguan, Guangdong, China

Corresponding Author:

Xiaoran Sun E-mail: [xiaoran.sun@swpu.edu.cn](mailto:xiaoran.sun@swpu.edu.cn)

Hua Yu E-mail: [yuhua@gbu.edu.cn](mailto:yuhua@gbu.edu.cn)

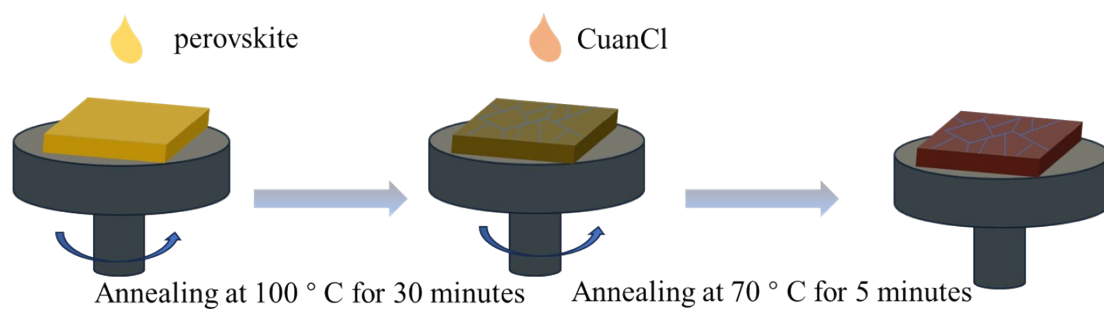

**Fig. S1** Schematic representation of the process for post-treatment of perovskite films with CuanCl.

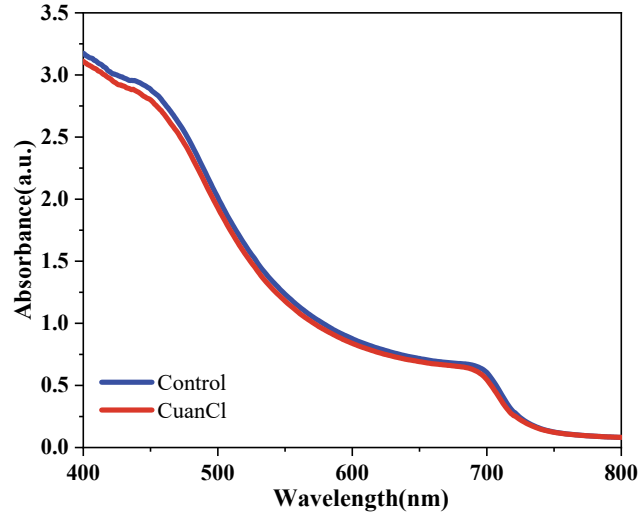

**Fig. S2** UV-Vis spectra of the perovskite prepared with and without CuanCl treatment.

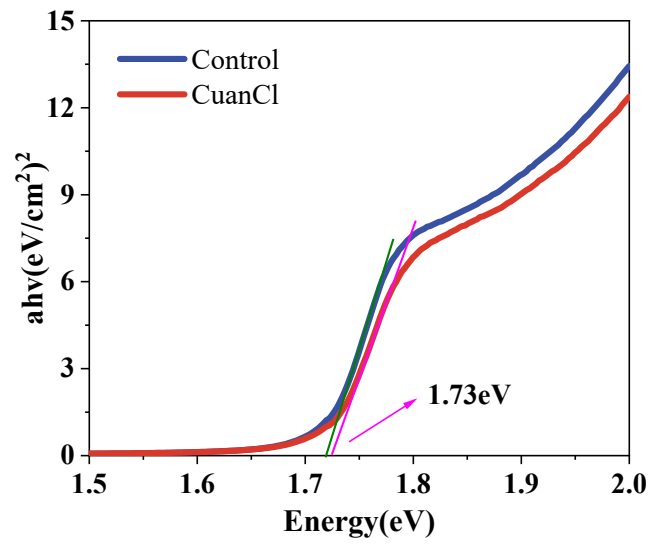

**Fig. S3** Tauc plot calculated from the UV-vis.

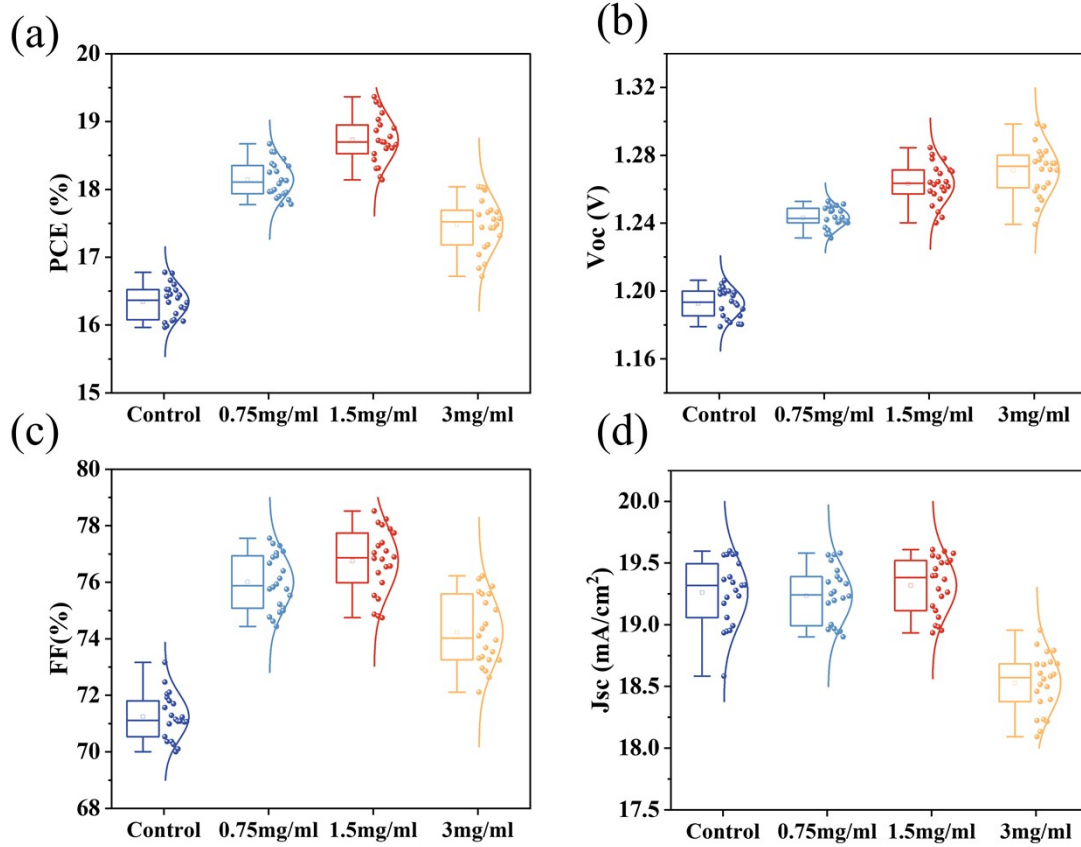

**Fig. S4** The photovoltaic parameters of WBG PSCs: (a) PCE, (b)  $V_{oc}$ , (c) FF, and (d)  $J_{sc}$ , extracted from J–V measurements of PSCs based on different CuanCl concentrations treatment.

**Table S1** The fitting parameters of the TRPL spectra of the perovskite thin films.

| Sample  | $A_1$ (%) | $\tau_1$ (ns) | $A_2$ (%) | $\tau_2$ (ns) | $\tau_{ave}$ (ns) |
|---------|-----------|---------------|-----------|---------------|-------------------|
| Control | 100.40    | 10.40         | 25.25     | 149.29        | 119.16            |
| CuanCl  | 35.10     | 80.43         | 24.83     | 600.67        | 517.87            |

**Table S2** Comparing the  $J_{SC, EQE}$  and  $J_{SC, JV}$  between the control device and the CuanCl-treated device.

| Sample  | $J_{SC, JV}$ [ $\text{mA}/\text{cm}^2$ ] | $J_{SC, EQE}$ [ $\text{mA}/\text{cm}^2$ ] | Deviation percentage [%] |
|---------|------------------------------------------|-------------------------------------------|--------------------------|
| Control | 19.56                                    | 18.98                                     | 3.0                      |
| CuanCl  | 19.60                                    | 18.67                                     | 4.7                      |

**Table S3** Statistical summary of the photovoltaic parameters for wide-bandgap perovskite solar cells with reported  $E_g > 1.7$  eV in the literature.

| Eg [eV]     | Perovskite                                                           | $V_{oc}$ [eV] | $J_{sc}$ [mA $cm^{-1}$ ] | FF [%]       | PCE [%]      | $V_{loss}$ [V] | REF              |
|-------------|----------------------------------------------------------------------|---------------|--------------------------|--------------|--------------|----------------|------------------|
| 1.8         | $FA_{0.9}Cs_{0.1}Pb(I_{0.6}Br_{0.4})_3$                              | 1.26          | 18.07                    | 83.44        | 18.92        | 0.54           | 1                |
| 1.77        | $FA_{0.8}Cs_{0.2}Pb(I_{0.6}Br_{0.4})_3$                              | 1.29          | 17.54                    | 82.61        | 18.63        | 0.48           | 2                |
| 1.76        | $FA_{0.8}Cs_{0.2}Pb(I_{0.6}Br_{0.4})_3$                              | 1.26          | 18.5                     | 76.5         | 17.8         | 0.50           | 3                |
| 1.74        | $FA_{0.83}Cs_{0.12}MA_{0.05}Pb(I_{0.6}Br_{0.4})_3$                   | 1.25          | 19.8                     | 79.8         | 20.1         | 0.49           | 4                |
| 1.77        | $FA_{0.8}Cs_{0.2}Pb(I_{0.6}Br_{0.4})_3$                              | 1.25          | 18.79                    | 83.70        | 19.66        | 0.52           | 5                |
| 1.75        | $FA_{0.8}Cs_{0.2}Pb(I_{0.7}Br_{0.3})_3$                              | 1.28          | 18.85                    | 78.5         | 18.85        | 0.47           | 6                |
| 1.7         | $FA_{0.85}Cs_{0.15}Pb(I_{0.7}Br_{0.3})_3$                            | 1.20          | 20.24                    | 80.4         | 18.91        | 0.50           | 7                |
| 1.78        | $(FA_{0.79}MA_{0.16}Cs_{0.05})_{0.95}Rb_{0.05}Pb(I_{0.6}Br^{0.4})_3$ | 1.19          | 18.53                    | 80.3         | 17.71        | 0.59           | 8                |
| 1.74        | $FA_{0.83}Cs_{0.17}Pb(I_{0.6}Br_{0.4})_3$                            | 1.28          | 19.1                     | 76.6         | 19.1         | 0.46           | 9                |
| 1.73        | $FA_{0.8}Cs_{0.2}Pb(I_{0.7}Br_{0.3})_3$                              | 1.25          | 19.48                    | 78.9         | 19.07        | 0.48           | 10               |
| 1.75        | $FA_{0.8}Cs_{0.2}Pb(I_{0.7}Br_{0.3})_3$                              | 1.24          | 17.92                    | 81.9         | 18.19        | 0.51           | 11               |
| 1.74        | $FA_{0.83}Cs_{0.17}Pb(I_{0.6}Br_{0.4})_3$                            | 1.20          | 19.84                    | 78           | 18.51        | 0.54           | 12               |
| <b>1.73</b> | <b><math>FA_{0.8}Cs_{0.2}Pb(I_{0.7}Br_{0.3})_3</math></b>            | <b>1.27</b>   | <b>19.60</b>             | <b>77.28</b> | <b>19.36</b> | <b>0.46</b>    | <b>This work</b> |

## References

- 1 Y. Tang, Y. Zhang, X. Zhou, T. Huang, K. Shen, K. Zhang, X. Du, T. Shi, X. Xiao, N. Li, C. J. Brabec, Y. Mai and F. Guo, *Nano Energy*, 2023, **114**, 108653.
- 2 W. Wang, X. Liu, J. Wang, C. Chen, J. Yu, D. Zhao and W. Tang, *Advanced Energy Materials*, 2023, **13**, 2300694.
- 3 Y.-H. Chiang, K. Frohna, H. Salway, A. Abfalterer, L. Pan, B. Roose, M. Anaya and S. D. Stranks, *ACS Energy Lett.*, 2023, **8**, 2728–2737.
- 4 Z. Liu, L. Wang, X. Xie, C. Xu, C. Zhang and P. Chen, *J. Mater. Chem. C*, 2023, **11**, 15898–15906.
- 5 Z. Zhang, J. Wang, J. Liang, Y. Zheng, X. Wu, C. Tian, A. Sun, Y. Huang, Z. Zhou, Y. Yang, Y. Liu, C. Tang, Z. Chen and C. Chen, *Small*, 2023, **19**, 2303213.
- 6 Y. Yu, R. Liu, M. Xu and H. Yu, *EcoMat*, 2023, **5**, e12272.
- 7 R. Xia, Y. Xu, B. Chen, H. Kanda, M. Franckevičius, R. Gegevičius, S. Wang, Y. Chen, D. Chen, J. Ding, N. Yuan, Y. Zhao, C. Roldán-Carmona, X. Zhang, P. J. Dyson and M. K. Nazeeruddin, *J. Mater. Chem. A*, 2021, **9**, 21939–21947.
- 8 K. M. Reza, A. Gurung, B. Bahrami, A. H. Chowdhury, N. Ghimire, R. Pathak, S. I. Rahman, M. A. R. Laskar, K. Chen, R. S. Bobba, B. S. Lamsal, L. K. Biswas, Y. Zhou, B. Logue and Q. Qiao, *Solar RRL*, 2021, **5**, 2000740.
- 9 S. Gharibzadeh, I. M. Hossain, P. Fassel, B. A. Nejjand, T. Abzieher, M. Schultes, E. Ahlswede, P. Jackson, M. Powalla, S. Schäfer, M. Rienäcker, T. Wietler, R. Peibst,

- U. Lemmer, B. S. Richards and U. W. Paetzold, *Adv Funct Materials*, 2020, **30**, 1909919.
- 10 C. Chen, Z. Song, C. Xiao, R. A. Awni, C. Yao, N. Shrestha, C. Li, S. S. Bista, Y. Zhang, L. Chen, R. J. Ellingson, C.-S. Jiang, M. Al-Jassim, G. Fang and Y. Yan, *ACS Energy Lett.*, 2020, **5**, 2560–2568.
- 11 C. Chen, Z. Song, C. Xiao, D. Zhao, N. Shrestha, C. Li, G. Yang, F. Yao, X. Zheng, R. J. Ellingson, C.-S. Jiang, M. Al-Jassim, K. Zhu, G. Fang and Y. Yan, *Nano Energy*, 2019, **61**, 141–147.
- 12 T. Bu, J. Li, Q. Lin, D. P. McMeekin, J. Sun, M. Wang, W. Chen, X. Wen, W. Mao, C. R. McNeill, W. Huang, X.-L. Zhang, J. Zhong, Y.-B. Cheng, U. Bach and F. Huang, *Nano Energy*, 2020, **75**, 104917.
